# Supplementary material for: Triterpenoids functionalized at C-2 as diagenetic transformation products of 2,3-dioxygenated triterpenoids from higher plants in buried wood
Source: Royal Society of Chemistry journal article supplement (doi:10.1039/c2ob26191j), 2012-01-01
Supplement: c2ob26191j.pdf [file c2ob26191j.pdf]

## Electronic Supplementary Information

### Triterpenoids functionalized at C-2 as diagenetic transformation products of 2,3-dioxygenated triterpenoids from higher plants in buried wood

Gilles Schnell, Philippe Schaeffer, Estelle Motsch and Pierre Adam

#### 1. Extraction, fractionation of the organic extract of the buried oak wood sample and isolation of compounds 5a, 7a-12

##### 1.1 Isolation of compounds 5a, 7a-10a

Wood chips (26 g) were extracted by sonication (1 h, x 2) with a mixture of CH<sub>2</sub>Cl<sub>2</sub>/CH<sub>3</sub>OH (1:1, v/v; 600 ml, x 2). The solvent extract was filtered through a cotton plug and the solvent removed under reduced pressure yielding 490 mg of crude extract. An aliquot of the extract (340 mg) was acetylated overnight at room temperature (Ac<sub>2</sub>O/Pyridine 1:1 v/v, 4 ml). After removal of the solvent and excess reagent under reduced pressure, the acetylated extract was dissolved in CH<sub>2</sub>Cl<sub>2</sub> and esterified using an ethereal solution of diazomethane. The derivatized extract was further fractionated by liquid chromatography on silica gel eluting with a mixture of CH<sub>2</sub>Cl<sub>2</sub>/AcOEt (92:8 v/v) into 21 fractions (F1 - F21) which were analyzed by GC and GC-MS. The fractions F10 (5.4 mg) and F11 (3.6 mg) were fractionated by reversed phase HPLC (Dupont, Zorbax ODS 5 μm; 250 x 4.6 mm; CH<sub>3</sub>OH/H<sub>2</sub>O, 9:1 v/v; 1 ml min<sup>-1</sup>), yielding *ca.* 2 mg of each compound **7a** and **8a** with a purity > 90% (GC).

Similarly, the fractions F15 (4.0 mg), F16 (4.2 mg) and F17 (4.2 mg) were further fractionated by reversed phase HPLC (Dupont, Zorbax ODS 5 mm; 250 x 4.6 mm;

CH<sub>3</sub>OH/H<sub>2</sub>O, 85:15 v/v; 0.8 ml min<sup>-1</sup>), yielding compound **9a** and **10a** (*ca.* 1.5 mg of each) with a purity > 90% (GC) and < 1 mg of compound **5a**.

## 1.2 Isolation of compounds 11-12

Wood chips (43 g) were extracted by sonication (90 min) with a mixture of CH<sub>2</sub>Cl<sub>2</sub>/CH<sub>3</sub>OH (1:1, v/v; 300 ml). The solvent extract was filtered through a cotton plug, and the solvent removed under reduced pressure, yielding 702 mg of crude extract. An aliquot of the extract (564 mg) was acetylated overnight at room temperature (Ac<sub>2</sub>O/Pyridine 1:1 v/v, 4 ml). After removal of the solvent and excess reagent under reduced pressure, the acetylated extract was dissolved in CH<sub>2</sub>Cl<sub>2</sub> and esterified using an ethereal solution of diazomethane. The derivatized extract was further fractionated by liquid chromatography on silica gel eluting with a mixture of CH<sub>2</sub>Cl<sub>2</sub>/AcOEt (92:8 v/v) into 15 fractions (F1 – F15) which were analyzed by GC and GC-MS. The fractions F5-F10 (26 mg) which contained compounds **11** and **12** were combined and further fractionated by reversed phase HPLC (Dupont, Zorbax ODS 5 μm; 250 x 4.6 mm; CH<sub>3</sub>OH/H<sub>2</sub>O, 85:15 v/v; 0.8 ml min<sup>-1</sup>), yielding < 1 mg of each compound **11** and **12** with a purity > 90% (GC).

## 2. NMR Data

### 2.1 Compound 8a

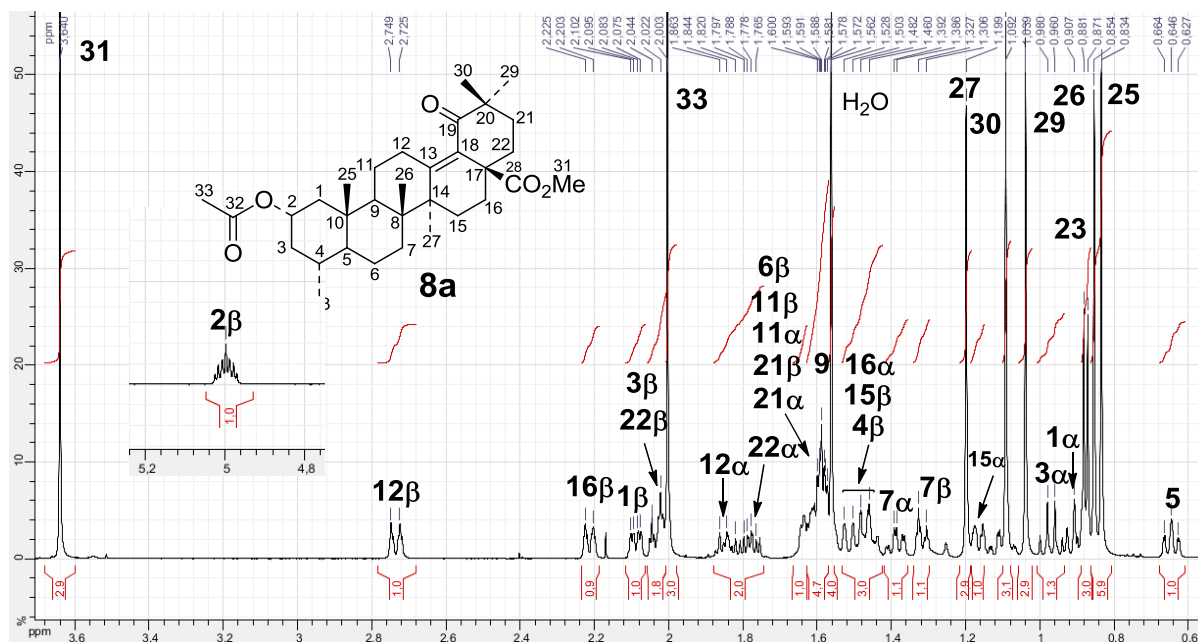

Figure 1: <sup>1</sup>H-NMR spectrum (600 MHz, CDCl<sub>3</sub>) of compound 8a.

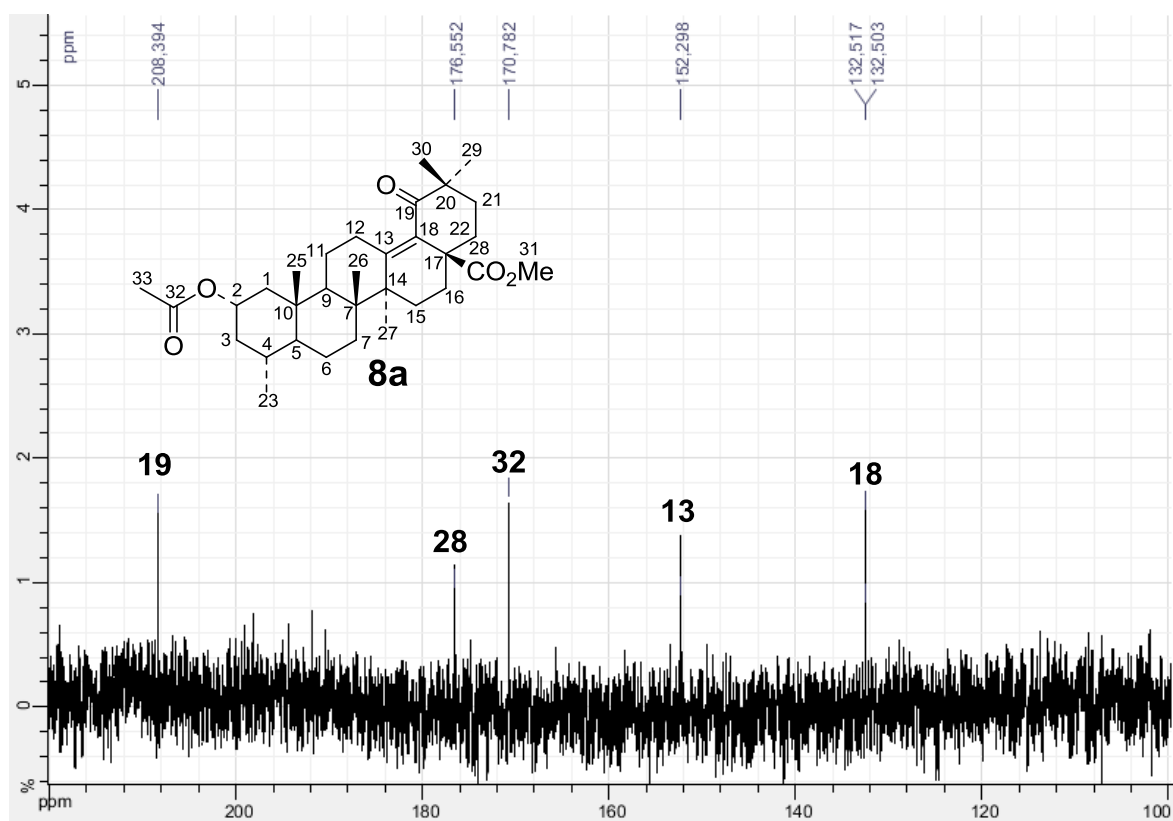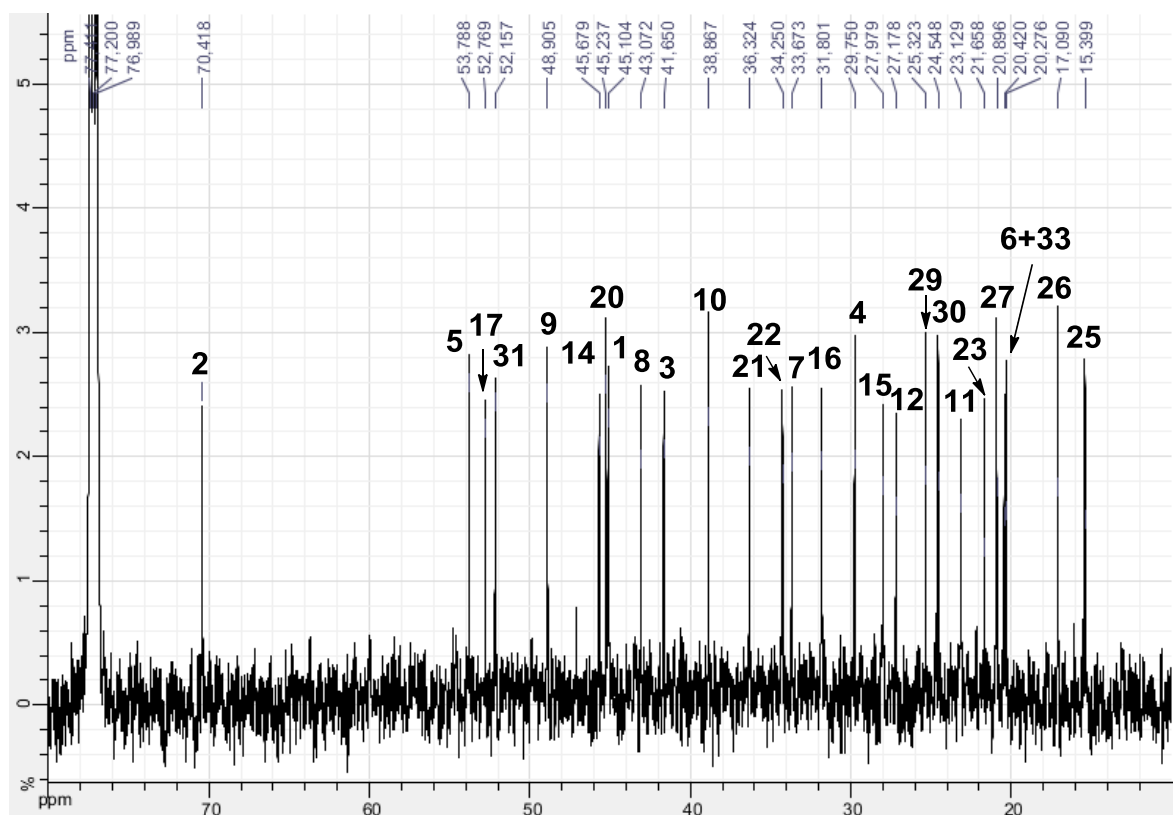

**Figure 2:**  $^{13}\text{C}$ -NMR spectrum (600 MHz,  $\text{CDCl}_3$ ) of compound **8a**

## 2.2 Compound 9a

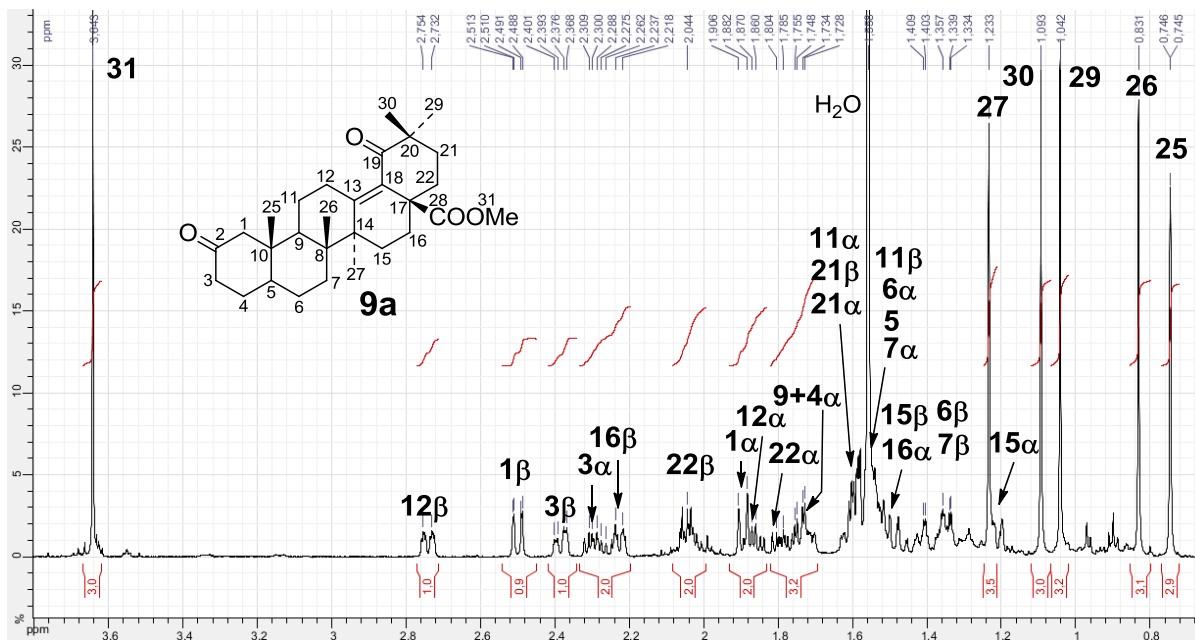

Figure 3: <sup>1</sup>H-NMR spectrum (600 MHz, CDCl<sub>3</sub>) of compound 9a

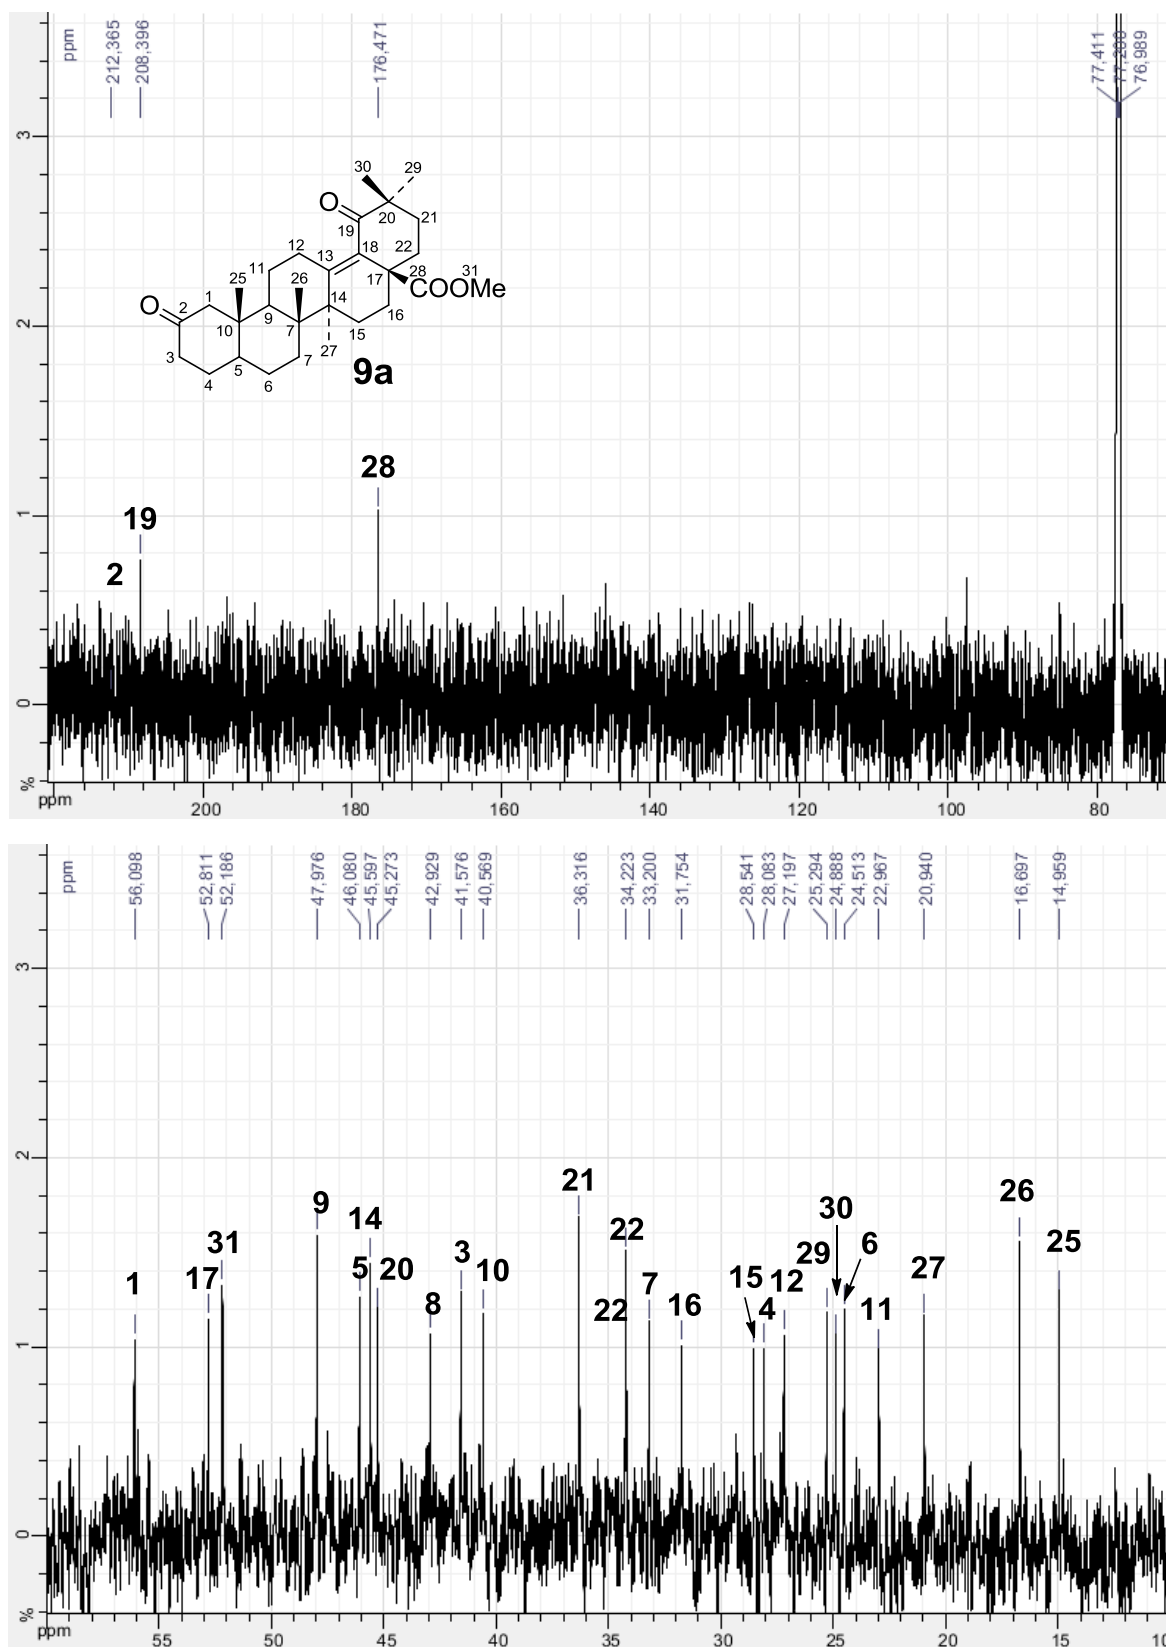

**Figure 4:**  $^{13}\text{C}$ -NMR spectrum (600 MHz,  $\text{CDCl}_3$ ) of compound **9a**. C-13 and C-18 could not be seen due to the low amounts of compound **9a** available.  $^{13}\text{C}$  chemical shifts of C-13 and C-18 were deduced from the HMBC experiment.



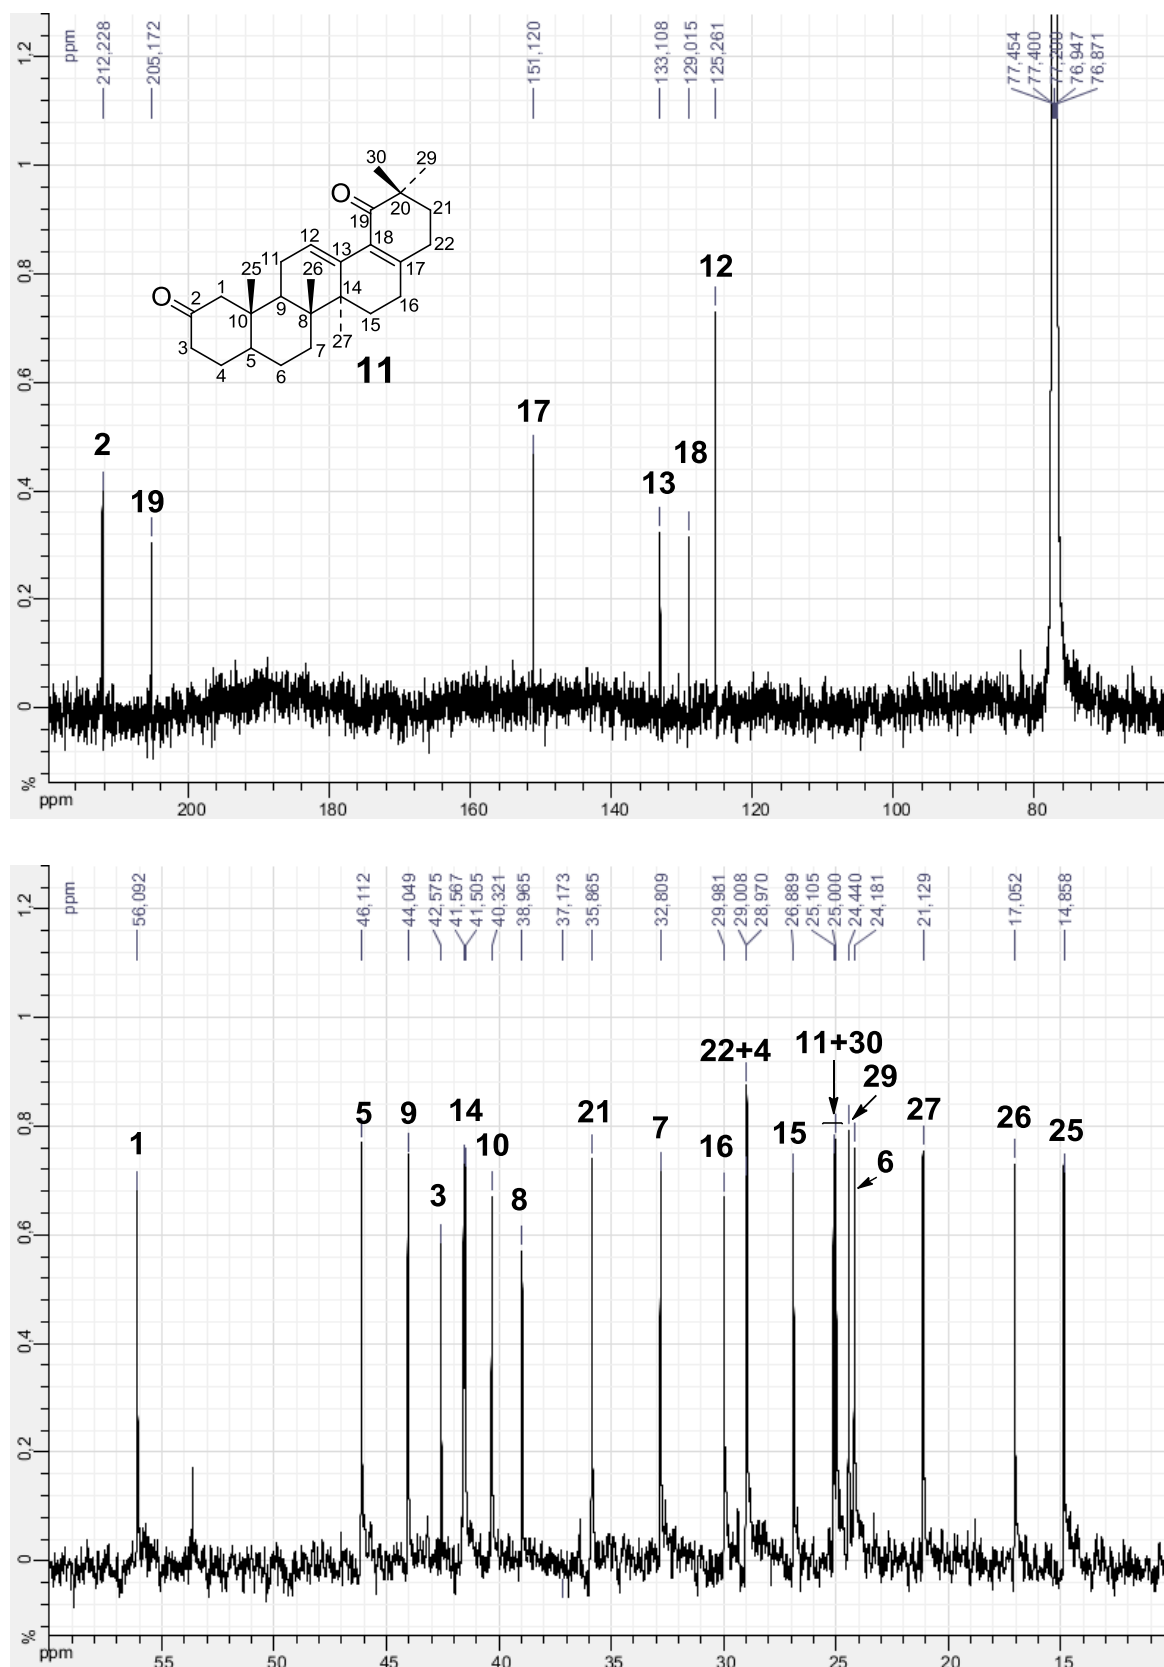

Figure 6:  $^{13}\text{C}$ -NMR spectrum (500 MHz,  $\text{CDCl}_3$ ) of compound **11**



## 2.4 Compound 5a

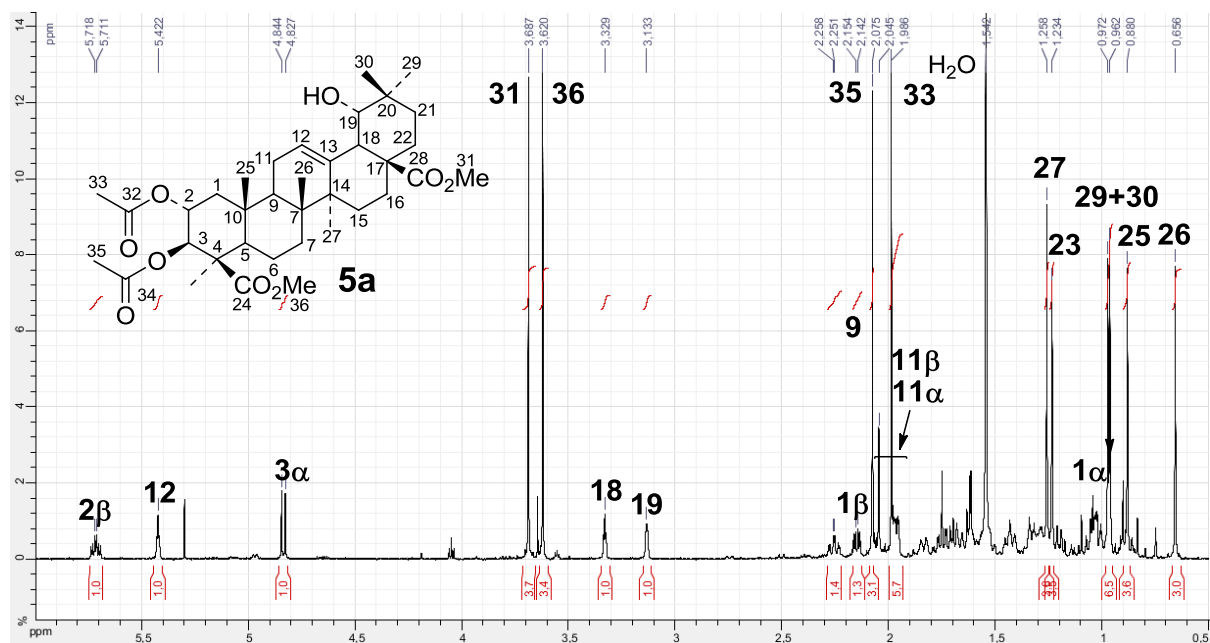

Figure 7: <sup>1</sup>H-NMR spectrum (600 MHz, CDCl<sub>3</sub>) of compound 5a
